# Psychiatric Services

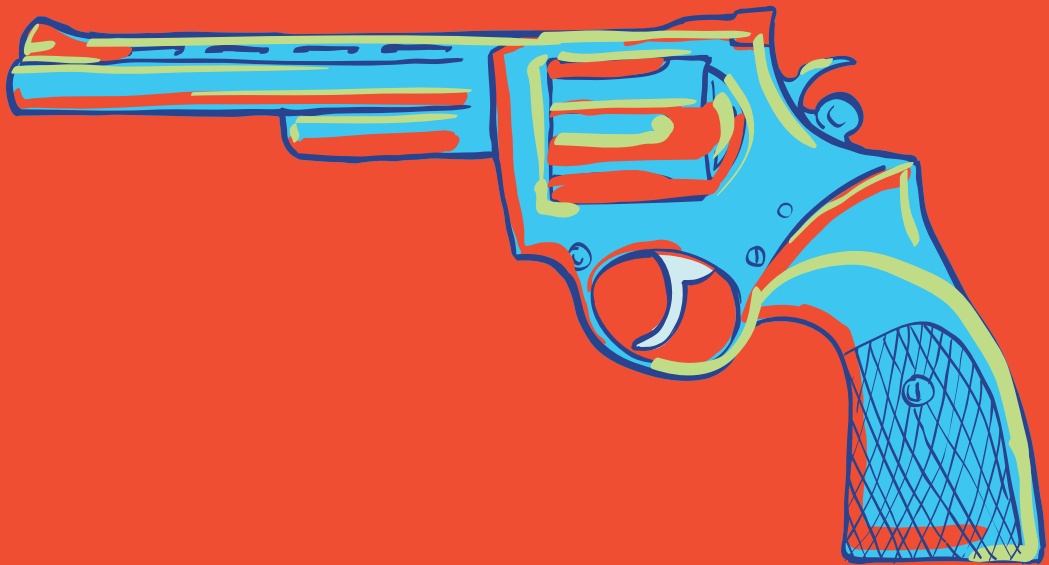

The role of health care systems in promoting firearm safety

Burnout and stressors among mental health workers

Disparities in mammography screening for women with schizophrenia

Rethinking the dichotomy between hospital and community psychiatry
