**ADULT INPATIENT PSYCHIATRIST/DIVISION CHAIR**  
Position F52380

The Department of Psychiatry at Virginia Commonwealth University (VCU) School of Medicine is seeking an accomplished and innovative Board Certified Psychiatrist to serve as Division Chair of its Adult Inpatient Services. This is an opportunity for a dynamic leader to help the Department of Psychiatry build collaborative relationships with clinicians, scientists, trainees, and students and to work across the university and externally. The successful candidate will have a leadership role in the department and hospital, reporting directly to the Department Chair. The incumbent will be expected to have administrative, leadership, teaching, and research experience. Resources will be available to the selected candidate to assist in building federally funded research studies/programs and recruiting other clinicians/investigators to the team. The successful candidate should have the vision and interest in helping VCU become a recognized leader in psychiatric care, scholarly activities, and research at the local, regional, national, and international level.

The core responsibilities of the Adult Inpatient Division Chair include, but are not limited to: managing and directing a 42-bed adult inpatient unit, supervising and training medical students, residents, and fellows, coordinating, developing and implementing best practices, some clinical duties, and developing/conducting research. Applicants should have a U.S. medical degree or equivalent (MD, MD/PhD, or DO), with licensure (or license eligible) to practice in the Commonwealth of Virginia and DEA licensure. Five to ten years of post-residency experience is required and fellowship training is preferred. Successful applicants will have demonstrated experience working in and fostering a diverse faculty, staff, and student environment, or commitment to do so as a faculty member at VCU.

Beginning in January 2020, Dr. Robert Findling will be VCU's Department of Psychiatry's Chair, who comes to us from Johns Hopkins. Dr. Findling's recruitment will serve as a catalyst for clinical growth as well as vigorous support for enhancement of scholarly activities both within the Adult Inpatient Division as well as the rest of the Department. VCU's Department of Psychiatry <http://psych.vcu.edu/> employs over 60 full-time faculty and has well-funded research in genetics <http://www.vipbg.vcu.edu/>, addictions [http://www.idas.vcu.edu](http://www.idas.vcu.edu/), child and women's mental health, and psychopharmacology. VCU Psychiatry is ranked #19 by NIH for research funding and its residents and faculty are ranked #1 for teaching in VCU's School of Medicine. VCU is a large urban university with a robust health science campus and 750-bed university hospital. Richmond, the State Capital, has a moderate climate and a rich mix of history with modern facilities, excellent suburban housing, public/private schools, and a low cost of living.

This is an excellent opportunity for an experienced clinician with interests in academic psychiatry. Salary, rank, and tenure status are contingent upon the candidate's qualifications. Interested applicants should apply online at <https://www.vcujobs.com/postings/96831>. Only electronic applications will be accepted. All submitted applications must include a letter of interest and CV. Questions should be directed to Tammy Beltz, HR Manager at [Tammy.Beltz@VCUHEALTH.org](mailto:Tammy.Beltz@VCUHEALTH.org).

Virginia Commonwealth University is an equal opportunity, Affirmative Action University providing access to education and employment without regard to age, race, color, national origin, gender, religion, sexual orientation, veteran's status, political affiliation or disability.

*"With mental health, addictions and neurosciences being a prominent strategic focus for us, we are committed to building on our academic strengths,"*  
said Michael Rao, Ph.D., President of VCU and VCU Health System.

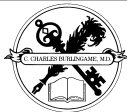

We are pleased to announce that  
**NED KALIN, M.D.**  
is the 2020 recipient of the  
**C. CHARLES BURLINGAME, M.D. AWARD**  
for his outstanding contributions to psychiatry.

**Past Recipients**

1988 Robert Kellner, M.D., Ph.D.  
1989 William T. Carpenter, Jr., M.D.  
1990 Dennis P. Cantwell, M.D.  
1991 George E. Vaillant, M.D.  
1992 A. John Rush, M.D.  
1993 John C. Nemiah, M.D.  
1994 Maurice J. Martin, M.D.  
1995 Otto F. Kernberg, M.D.  
1996 Charles P. O'Brien, M.D., Ph.D.  
1997 Glen Owen Gabbard, M.D.  
1998 Lissy F. Jarvik, M.D., Ph.D.  
1999 Nancy C. Andreasen, M.D., Ph.D.  
2000 Lewis L. Judd, M.D.  
2001 Paul S. Appelbaum, M.D.  
2002 Charles B. Nemeroff, M.D., Ph.D.  
2003 Dilip V. Jeste, M.D.  
2004 David H. Barlow, Ph.D.  
2005 Herbert D. Kleber, M.D.  
2006 Daniel N. Stern, M.D.  
2007 Jerrold F. Rosenbaum, M.D.  
2008 K. Ranga Rama Krishnan, M.D.  
2009 David J. Kupfer, M.D.  
2010 Professor Sir Michael Rutter  
2011 Jeffrey A. Lieberman, M.D.  
2012 Judith L. Rapoport, M.D.  
2013 Nora D. Volkow, M.D.  
2014 Daniel R. Weinberger, M.D.  
2015 David A. Brent, M.D.  
2016 Steven S. Sharfstein, M.D.  
2017 Harold Alan Pincus, M.D.  
2018 Kenneth S. Kendler, M.D.  
2019 Max Fink, M.D.

**Institute  
of Living**

A Division of Hartford Hospital  
200 Retreat Avenue  
Burlingame Building  
Hartford, CT 06106  
860-545-7560

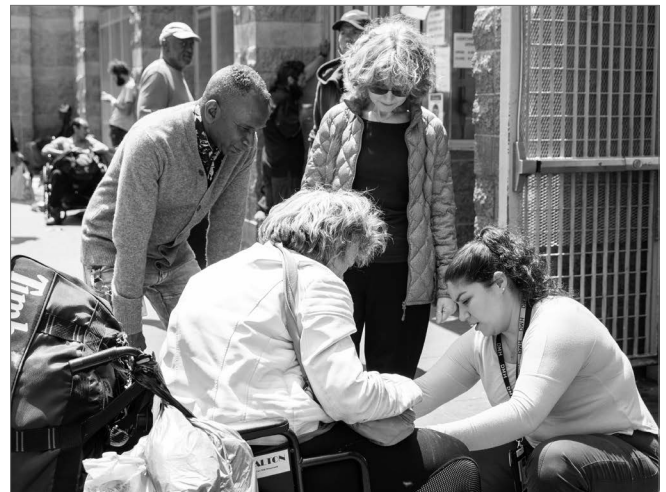

**Our Work  
Matters**

Make a difference  
for those who  
need it the most.

- Join the largest and most dynamic mental health department in the country
- Multiple avenues for advancement and professional development
- Flexible work schedules
- Unparalleled work-life balance
- Highly competitive benefits
- Competitive salary with potential bonuses of up to **\$32,000 annually**
- Student loan repayment incentive of up to **\$250,000**
- Reimbursement of eligible relocation costs of up to **\$15,000**

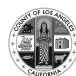

LOS ANGELES COUNTY  
**DEPARTMENT OF  
MENTAL HEALTH**  
hope. recovery. wellbeing.

[www.psychiatristjobs.la](http://www.psychiatristjobs.la)

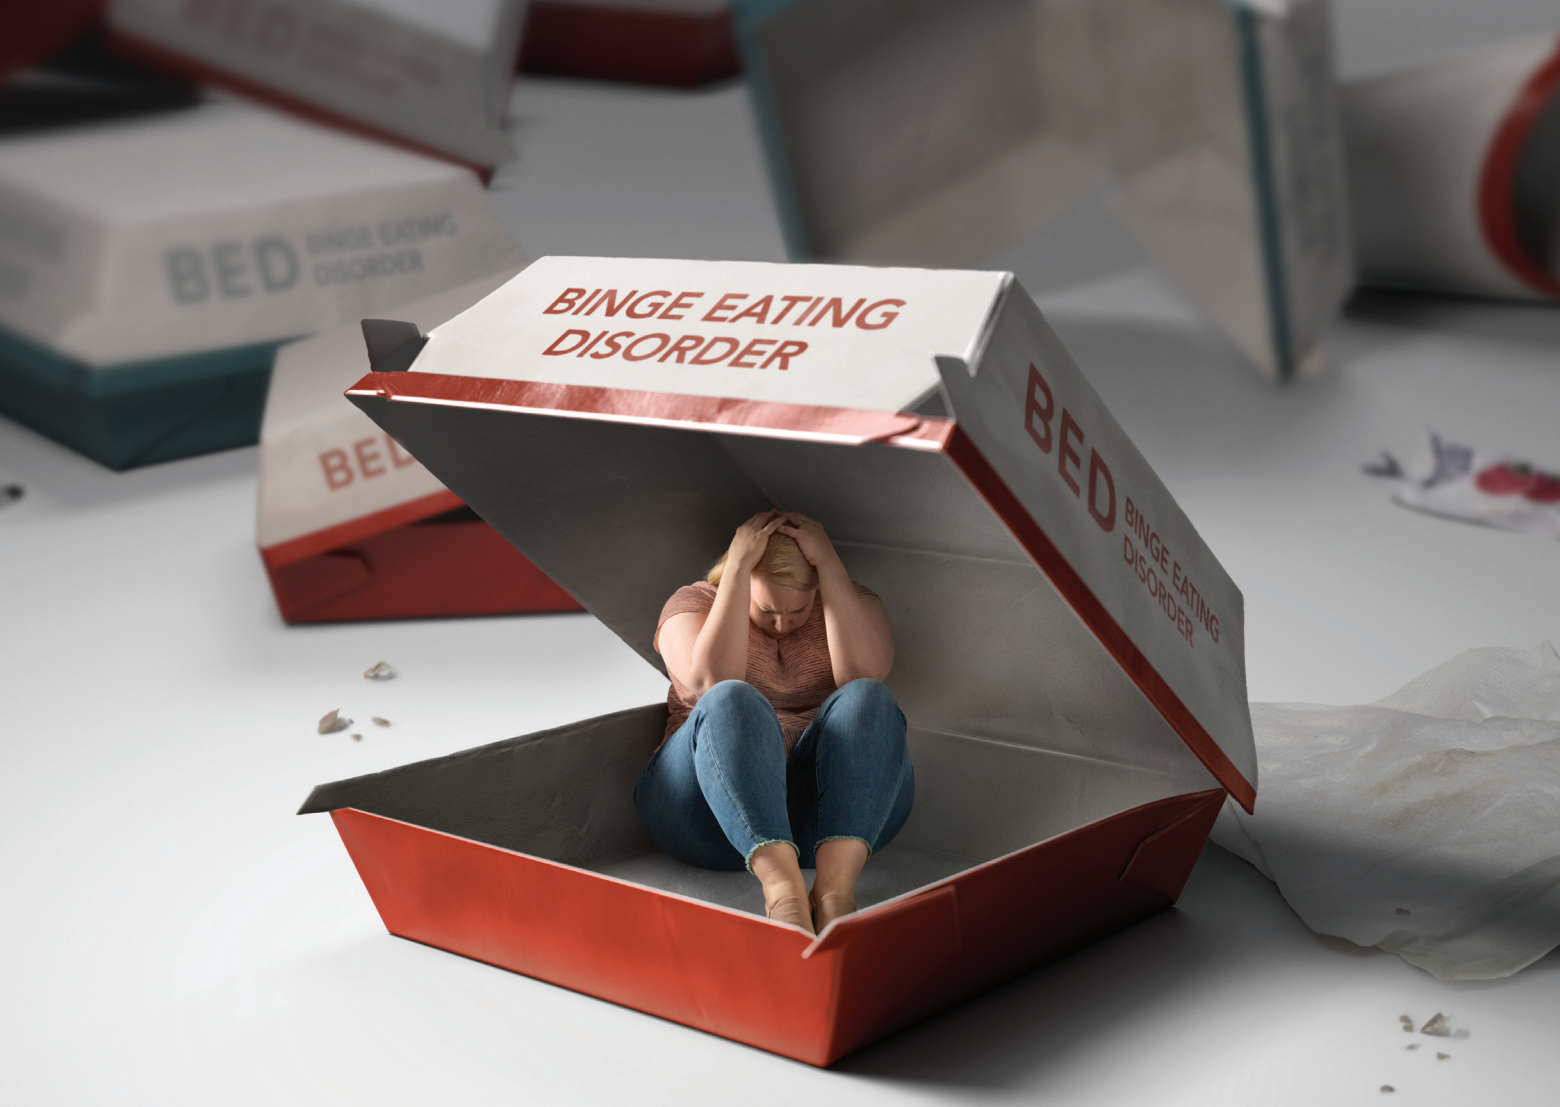

## BINGE EATING DISORDER (BED) CONSUMES HER

People with BED may feel trapped by compulsive eating behavior and obsessive thoughts around food<sup>1-3</sup>

BED is a neuropsychiatric condition that has been shown to significantly impact a patient's life, affecting both work and personal interactions.<sup>4,5</sup> But deep shame and guilt may cause people with BED to hide their symptoms<sup>4</sup>—even from their psychiatrists. Careful probing about BED symptoms may help patients feel more comfortable, so they don't shut down the conversation.<sup>6</sup>

► Visit [BurdenofBED.com](https://www.burdenofbed.com) to learn more and to download a Conversation Starter

Start the BED conversation

**References:** 1. Deal LS, Wirth RJ, Gasior M, et al. *Int J Eat Disord.* 2015;48(7):994-1004. 2. McElroy SL, Phillips KA, Keck PE, Jr. *J Clin Psychiatry.* 1994;55(10) suppl:33-51. 3. Beglin SJ, Fairburn CG. *Am J Psychiatry.* 1992;149(1):123-124. 4. American Psychiatric Association. Binge eating disorder. In: *Diagnostic and Statistical Manual of Mental Disorders, 5th ed.* Arlington, VA: American Psychiatric Association; 2013:350-353. 5. Rieger E, Wilfley DE, Stein RI, et al. *Int J Eat Disord.* 2005;37(3):234-240. 6. Kornstein SG, Keck PE Jr, Herman BK, et al. *Postgrad Med.* 2015;127(7):661-670.

SUNOVION and  are registered trademarks of Sumitomo Dainippon Pharma Co., Ltd. Sunovion Pharmaceuticals Inc. is a U.S. subsidiary of Sumitomo Dainippon Pharma Co., Ltd. © 2019 Sunovion Pharmaceuticals Inc. All rights reserved. 11/19 NPC-DAS-US-00085-19

 sunovion
